# Supplementary material for: Exploring Ty Resistance Genes and Genetic Diversity in Improved Tomato Lines Selected from Commercial Hybrids
Source: Research Square preprint supplement (doi:10.21203/rs.3.rs-6221116/v1), 2025-03-28
Supplement: Supplementary file 1 [file 3008df53c5c6ec8cc661709c.docx]

**Table S1. Phenotypes of the original commercial F1 tomato hybrids in the bulk selection program.**

| **F1 hybrid** | **Source** | **Phenotypez** |
| --- | --- | --- |
| **65010** | **Syngenta** | Determinate and resistant to TYLCV (*Ty-1*/*Ty-3a* and *Ty-4/ty-4*), fusarium (I-1 and I-2) and verticillium wilt. |
| **Nairouz (TH99806)** | **Syngenta** | Determinate; highly tolerant to TMV, verticillium and fusarium wilts; and TYLCV-moderately tolerant (*Ty-1*/*Ty-3*, *Ty-2*/*Ty-2*, and *Ty-4*/*ty-4*). |
| **SVTD8320** | **Seminis** | Indeterminate and tolerant to fusarium wilt, verticillium wilt, powdery mildew, and TYLCV (*Ty-1*/*Ty-3a*, *Ty-2*/*Ty-2*, *Ty-4*/*ty-4*, and *Ty-5*/*ty-5*). |
| **Tyrmes** | **Syngenta** | Indeterminate; and highly tolerant to verticillium and fusarium wilts (I-1 and I-2), and TMV (Tm-2); and TYLCV-moderately resistance/tolerance (*Ty-1*/*Ty-3a*, *Ty-2*/*ty-2*, *Ty-4*/*ty-4*, and *Ty-5*/*ty-5*). |

zPhenotypes are based on pamphlets of producing companies. TYLCV resistance genes were identified by **Mahmoud et al. (2023)**.

**Table S2. Phenotype of TYLCD-symptomless selected plants of F5 families.**

| **The original F1 hybrid** | **Codez** | **TSS** | **Average fruit weight (g)** | **Early Yield (g plant-1)** | **Total yield (g plant-1)** | **Flesh thickness (mm)** | **Fruit shape index** | **Fruit firmness (kg/cm2)** | **No. of fruit locules** |
| --- | --- | --- | --- | --- | --- | --- | --- | --- | --- |
| **‘Nairouz’** | **F5: 7-R2-8** | 3.5 | 80 | 2800 | 3500 | 0.7 | 0.88 | 3.60 | 3 |
| **F5: 7-R2-9** | **3.6** | **90** | **2200** | **4000** | **0.6** | **0.88** | **5.85** | **3** |
| **F5: 7-R3-1** | 3.5 | 75 | 3000 | 4000 | 0.6 | 0.88 | 5.85 | 5 |
| **F5: 7-R3-2** | 4.0 | 79 | 2600 | 3500 | 0.5 | 0.96 | 4.50 | 4 |
| **F5: 7-R3-3** | 4.0 | 80 | 2600 | 3450 | 0.5 | 0.96 | 4.41 | 3 |
| **F5: 7-R3-8** | 3.9 | 97 | 1605 | 3505 | 0.5 | 0.93 | 4.05 | 4 |
| **F5: 7-R3-9** | **4.0** | **95** | **2000** | **3500** | **0.6** | **0.97** | **5.54** | **4** |
| **F5: 7-R3-10** | 4.5 | 76 | 2200 | 3000 | 5.6 | 0.91 | 5.04 | 4 |
| **‘65010’** | **F5: 8-R2-2** | **6.1** | **100** | **500** | **3500** | **0.6** | **0.71** | **5.85** | **5** |
| **F5: 8-R2-3** | 3.4 | 115 | 2900 | 4000 | 0.6 | 0.83 | 5.45 | 3 |
| **F5: 8-R2-4** | 3.9 | 117 | 1100 | 3800 | 0.5 | 0.71 | 4.14 | 5 |
| **F5: 8-R3-3** | 3.5 | 70 | 1500 | 3500 | 0.5 | 0.86 | 6.03 | 4 |
| **F5: 9-R2-2** | **4.2** | **97** | **1800** | **3250** | **0.8** | **0.84** | **6.84** | **4** |
| **F5: 9-R2-5** | 4.6 | 105 | 900 | 3000 | 0.4 | 0.83 | 4.14 | 4 |
| **F5: 10-R1-3** | 3.9 | 86 | 1600 | 3000 | 0.4 | 0.81 | 5.31 | 4 |
| **F5: 10-R1-4** | 4.0 | 90 | 1000 | 3200 | 0.4 | 0.88 | 5.31 | 4 |
| **F5: 10-R3-1** | 3.1 | 105 | 1900 | 3500 | 0.4 | 0.72 | 6.08 | 5 |
| **F5: 11-R2-1** | **5.3** | **100** | **1700** | **3500** | **0.7** | **0.73** | **4.95** | **5** |
| **F5: 11-R2-2** | 3.5 | 110 | 2050 | 3000 | 0.6 | 0.72 | 3.60 | 6 |
| **F5: 11-R2-3** | **4.0** | **110** | **1000** | **3150** | **0.7** | **0.70** | **4.50** | **4** |
| **F5: 11-R2-4** | 3.5 | 105 | 1600 | 3200 | 0.6 | 0.73 | 4.73 | 5 |
| **F5: 11-R2-5** | 3.0 | 100 | 1700 | 3300 | 0.6 | 0.70 | 4.64 | 5 |
| **F5: 11-R2-6** | 3.6 | 113 | 1500 | 3050 | 0.5 | 0.72 | 4.77 | 4 |
| **F5: 11-R2-7** | 3.5 | 110 | 1450 | 3000 | 0.7 | 0.70 | 4.50 | 4 |
| **F5: 11-R2-9** | 3.7 | 106 | 2100 | 3500 | 0.6 | 0.73 | 4.82 | 4 |
| **F5: 11-R2-10** | 3.5 | 110 | 1800 | 3600 | 0.6 | 0.69 | 4.95 | 5 |
| **F5: 11-R2-11** | 3.1 | 115 | 1600 | 3400 | 0.5 | 0.70 | 4.73 | 4 |
| **F5: 11-R3-1** | 2.8 | 85 | 600 | 3200 | 0.4 | 0.84 | 4.55 | 6 |
| **‘SV8320’** | **F5: 12-R1-3** | 3.0 | 90 | 2700 | 3400 | 0.5 | 0.70 | 4.95 | 4 |
|  | **F5: 12-R1-4** | 3.6 | 90 | 800 | 3000 | 0.5 | 0.68 | 4.05 | 4 |
|  | **F5: 12-R1-5** | 3.4 | 85 | 1900 | 3000 | 0.4 | 0.78 | 4.50 | 5 |
|  | **F5: 12-R3-1** | **4.0** | **115** | **2300** | **3800** | **0.7** | **0.72** | **5.04** | **5** |
|  | **F5: 12-R3-4** | 3.5 | 105 | 1505 | 3505 | 0.6 | 0.89 | 5.22 | 4 |
|  | **F5: 14-R1-1** | **4.1** | **120** | **1000** | **3500** | **0.7** | **0.73** | **6.89** | **4** |
|  | **F5: 14-R1-2** | **4.0** | **115** | **900** | **3400** | **0.7** | **0.74** | **6.30** | **4** |
|  | **F5: 14-R1-3** | 3.9 | 125 | 1100 | 3500 | 0.7 | 0.72 | 6.08 | 4 |
|  | **F5: 14-R1-4** | **4.0** | **120** | **1300** | **3300** | **0.7** | **0.75** | **5.85** | **4** |
|  | **F5: 14-R1-5** | **4.2** | **120** | **1100** | **3200** | **0.7** | **0.70** | **6.35** | **4** |
|  | **F5: 14-R1-6** | **4.1** | **115** | **1300** | **3400** | **0.7** | **0.71** | **6.39** | **4** |
|  | **F5: 14-R1-7** | 3.9 | 120 | 1500 | 3500 | 0.7 | 0.73 | 6.26 | 4 |
|  | **F5: 14-R1-8** | **4.0** | **125** | **1250** | **3250** | **0.7** | **0.73** | **6.08** | **4** |
|  | **F5: 14-R1-9** | **4.2** | **120** | **1000** | **3350** | **0.7** | **0.73** | **6.53** | **4** |
|  | **F5: 14-R1-10** | **4.5** | **115** | **1600** | **3400** | **0.7** | **0.71** | **6.44** | **4** |
|  | **F5: 14-R1-11** | **4.0** | **115** | **1250** | **3450** | **0.7** | **0.71** | **6.12** | **4** |
|  | **F5: 14-R1-12** | 3.9 | 115 | 1000 | 3000 | 0.7 | 0.71 | 6.71 | 4 |
| **‘Tyrmes’** | **F5: 17-R1-1** | 3.4 | 95 | 1200 | 3000 | 0.5 | 0.83 | 5.40 | 3 |
| **F5: 18-R1-1** | **4.0** | **150** | **1500** | **3000** | **0.5** | **0.68** | **5.94** | **5** |

zCode: Gerneration – plant number in replicate.

The selected F5 symptomless plants are shaded in green.

**Table S3. Scheme of ANOVA and ANCOVA for pooled data from two years of RCBD.**

| **Source of variance** | **df** | **MS (or MP)** | **Expected MS** | **Expected mean cross products** |
| --- | --- | --- | --- | --- |
| **Year (Y)** | **y-1** | **-** | **-** | **-** |
| **Replicate (R)** | **r-1** | **-** | **-** | **-** |
| **R (Y)** | **y (r-1)** | **-** | **-** | **-** |
| **Genotype (G)** | **l-1** | **MSg** | ***δ2e* + r*δ2gy* + yr*δ2g*** | ***COVe* + r*COVgy* + yr*COVg*** |
| **G × Y** | **(y-1) (g-1)** | **MSgy** | ***δ2e* + r*δ2gy*** | ***COVe* + r*COVgy*** |
| **Pooled error** | **y (r-1) (g-1)** | **MSe** | ***δ2e*** | ***COVe*** |

y: number of years, r: number of replicates, and g: number of germplasm (tomato lines).

*δ2g*: genotypic variance, *δ2gy*: interaction variance between germplasm and years; *δ2e*: error variance; and similarly, for covariances.

| **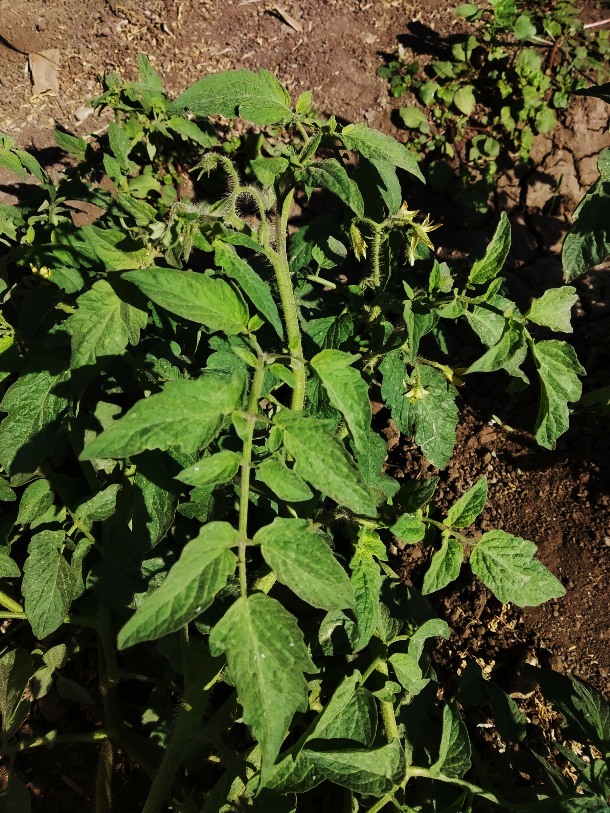**  **Score 1** | **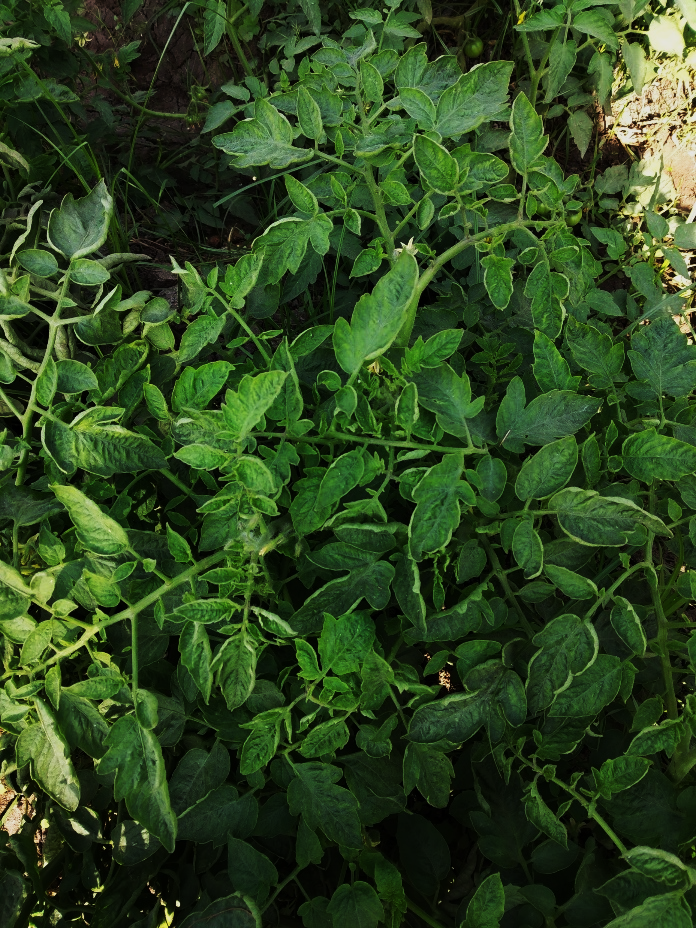**  **Score 2** |
| --- | --- |
| **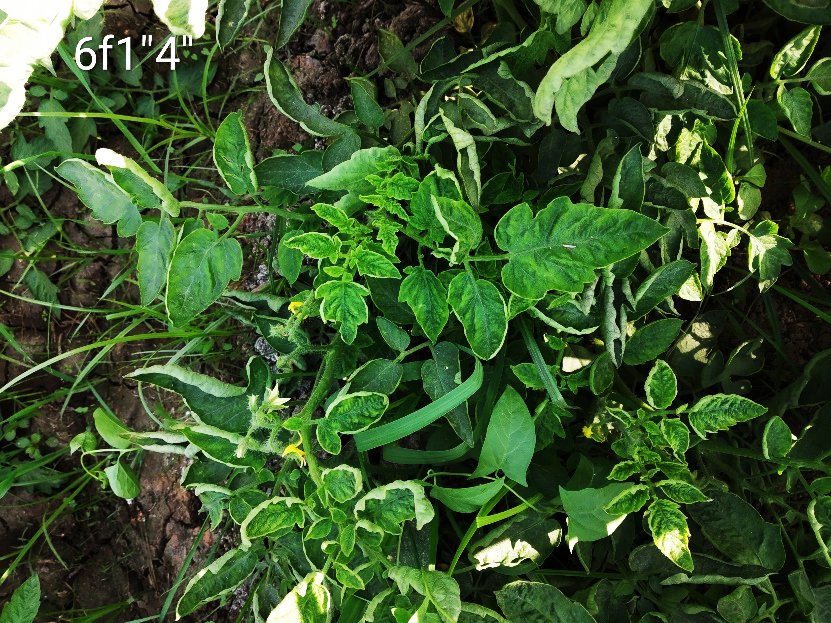**  **Score 3** | **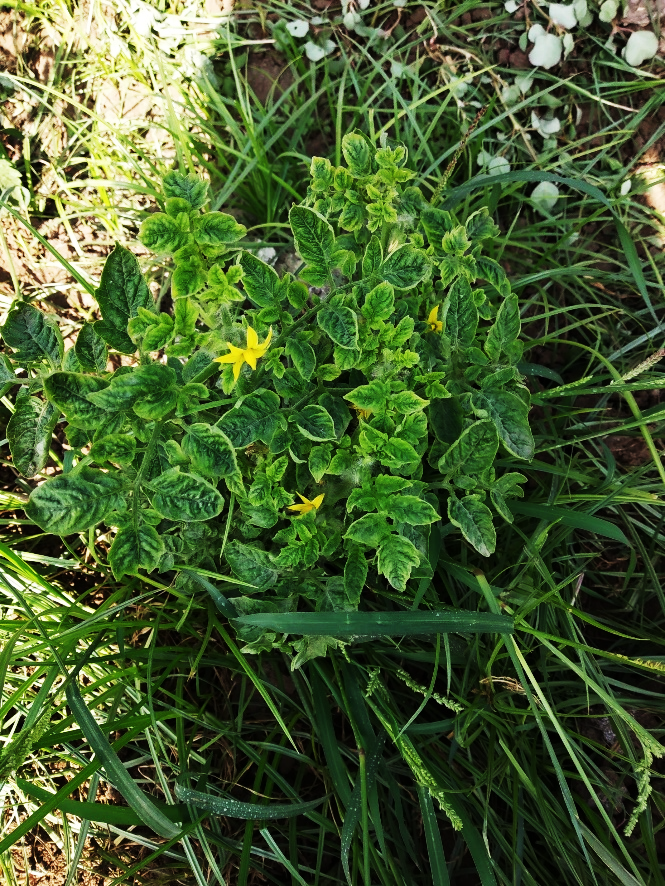**  **Score 4** |
| **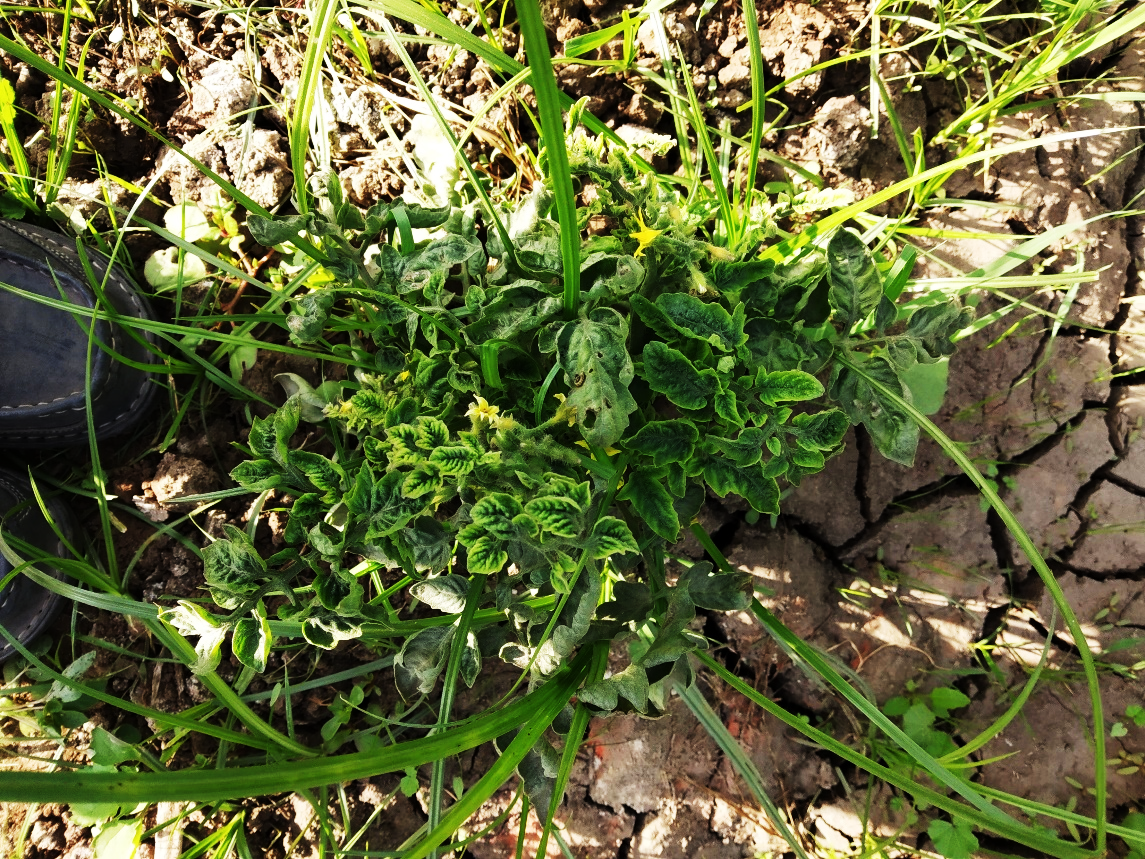**  **Score 5** | |

**Fig. S1. TYLCD symptoms severity score.**

The score is 1: symptomless plant, 2: slight symptoms on plant top, 3: moderate symptoms, 4: severe symptoms on the entire plant, and 5: severe symptoms and plant stunting.

| 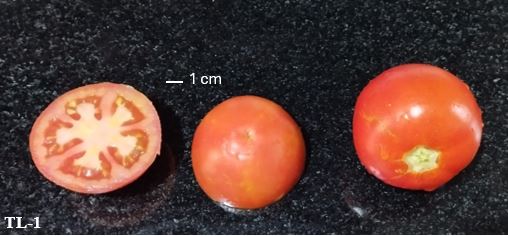 | 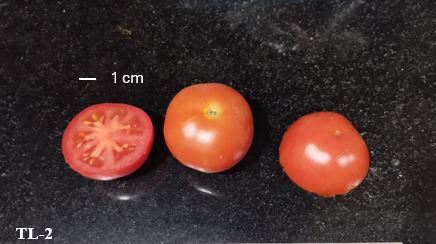 | 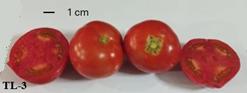 | | 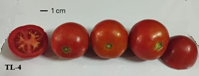 |
| --- | --- | --- | --- | --- |
| 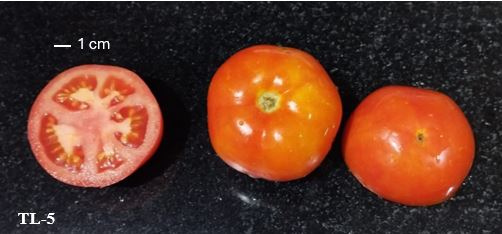 | 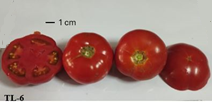 | 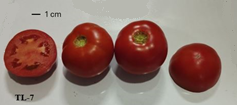 | | 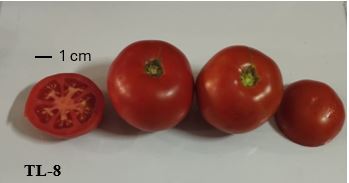 |
| 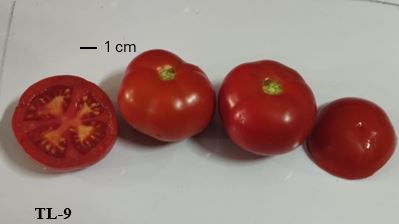 | 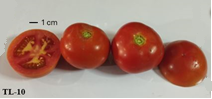 | 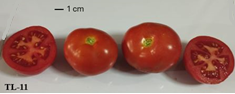 | | 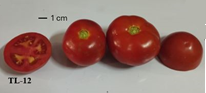 |
| 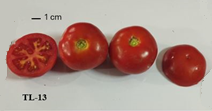 | 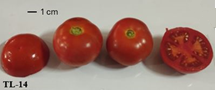 | 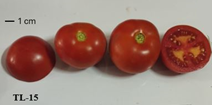 | | 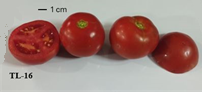 |
| 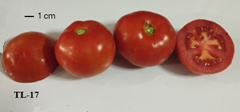 | | | 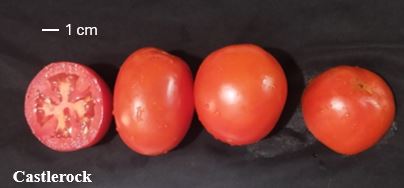 | |

**Fig. S2. Fruits of tomato lines.**

F7 tomato lines selected from tomato commercial F1 hybrids ‘Nairouz’ for TL-1&TL-2, ‘65010 F1’ for TL-3&TL-6, ‘SVTD8320 F1’ for TL-7-TL16, and ‘Tyrmes F1’ for TL-17.

A photo’s aspect ratios are preserved when zoomed in, highlighting the 1cm mark in each one.
