# Supplementary material for: Exploring Ty Resistance Genes and Genetic Diversity in Improved Tomato Lines Selected from Commercial Hybrids
Source: Research Square preprint supplement (doi:10.21203/rs.3.rs-6221116/v1), 2025-03-28
Supplement: Supplementary file 2 [file 98f73a8c9efd2722d4c554ed.docx]

**Table 1. Sequences of the used primers.**

| **Marker** | **Marker type** | **Targeted gene** | **Chromosome number** | **Single nucleotide sequence (5’-3’)** | **Annealing temperature (°C)** | **Restriction enzyme** | **Molecular size of bands (bp)** | **Molecular size after digesting with enzyme (bp)** | **Reference** |
| --- | --- | --- | --- | --- | --- | --- | --- | --- | --- |
| ***TY-1/3_K*** | **SCAR** | ***Ty-1*/*Ty-3*** | **6** | F: ACAGGAAAAATGGGTGATCC  R: CCTGCTCCTTGCAGATTCTA | 55 | - | RR: 114  SS: 102 | - | **Chen et al. [40]** |
| ***Rex-1*** | **CAPS** | ***Ty-1*** | **6** | F: TCGGAGCCTTGGTCTGAATT  R: ATGCCAGAGATGATTCGTGA | 55 | *Taq-1* | 750 | RR: 570&180  SS: 750 | **Williamson et al. [41]** |
| ***TY-1*** | **CAPS** | ***Ty-1*** | **6** | F: TAATCCGTCGTTACCTCTCCTT  R: CGGATGACTTCAATAGCAATGA | 55 | *Taq-1* | 398 | RR: 300&95  SS: 398 | **Chen et al. [42]** |
| ***P6-25*** | **SCAR** | ***Ty-3***  ***Ty-3a***  ***Ty-3b*** | **6** | F: GGTAGTGGAAATGATGCTGCTC  R: GCTCTGCCTATTGTCCCATATATAACC | 53 | - | RR: 623bp for *Ty-3a*, 453bp for *Ty-3*, and 660bp for *Ty-3b.*  SS: 320bp | - | **Nevame et al. [43]** |
| ***FER-G8*** | **CAPS** | ***Ty-3*** | **6** | F: CATCCCGTGCATCCAAAGTGAC  R: CTAAGGGTGTACCCCAAGGGAAC | 55 | *Taq-1* | 500 | RR: 50, 200, 250, 300 & 500 | **Ji et al. [20]** |
| ***TG0302*** | **SCAR** | ***Ty-2*** | **11** | F: TGGCTCATCCTGAAGCTGATAGCGC  R: AGTGTACATCCTTGC CATTGACT | 55 | - | RR: 900  SS: 800 | - | **Garcia et al. [44]** |
| ***C2_At4g17300*** | **CAPS** | ***Ty-4*** | **3** | F: ATTTAACCGTGTCTGGGCAACTCAATGG  R: GCTCACTTTGCAAATCACATCCCCATTTCACC | 55 | *Afll* | 325 | RR: 325  SS: 200 | **Ji et al. [24]** |
| ***SINAC1*** | **SSR** | ***ty-5*** | **4** | F: TGCCTGGTTTCTGCTGTCA  R: TAAAGCTGAAGAAGGACTTACCCT | 55 | *Taq-1* | 420 | RR: 300/425  SS: 350 | **Anbinder et al. [29]** |
| ***UF_10.61192*** | **CAPS** | ***Ty-6*** | **10** | F: CATAAAGTTCCGGCGAGTGT  R: TCCATTCCAAACCAAGTGAAG |  | *BssHII* | 632 | RR: 632  SS: 600 | **Gill et al. [27] and Sim et al. [45]** |

**Table 2. The combined ANOVA and genetic parameters for 27 traits of tomato lines and ‘Castlerock’ over the 2022 and 2023 fall seasons.**

| **Traitz** | | **Source of Variance** | | | | | | | | | | | | |
| --- | --- | --- | --- | --- | --- | --- | --- | --- | --- | --- | --- | --- | --- | --- |
| **Year (Y) df= 1** | | | **Replication (Y) df= 4** | | **Genotypes (G) df= 17** | | | **Y × G df= 17** | | **Pooled Error df= 68** | |  |
| **TYLCDS-45** | | 0.564ns | | | 0.06 | | 2.091*** | | | 0.070ns | | 0.049 | | 1.79 |
| **TYLCDS-90** | | 1.181ns | | | 0.198 | | 3.419*** | | | 0.308** | | 0.113 | | 2.1 |
| **PL** | | 105.613* | | | 3.843 | | 9525.423*** | | | 41.135*** | | 4.882 | | 87.55 |
| **NPMB** | | 0.113ns | | | 0.151 | | 10.904*** | | | 0.073ns | | 0.283 | | 6.88 |
| **LA** | | 30619.233ns | | | 10730.59 | | 23732.969*** | | | 2944.508ns | | 1905.141 | | 279.31 |
| **Chlor-a** | | 404.802ns | | | 732.705 | | 74.048ns | | | 34.934ns | | 143.488 | | 29.41 |
| **Chlor-b** | | 305.175ns | | | 66.566 | | 21.071ns | | | 13.579ns | | 26.312 | | 12.42 |
| **T-Chlor** | | 1412.829ns | | | 1139.387 | | 165.835ns | | | 84.266ns | | 286.578 | | 41.83 |
| **T-Carot** | | 80.696ns | | | 32.934 | | 3.304ns | | | 1.765ns | | 5.654 | | 5.1 |
| **NPF** | | 1085.535** | | | 5.509 | | 409.882*** | | | 23.948*** | | 0.846 | | 34.8 |
| **AFW** | | 57.985ns | | | 2.675 | | 1423.126*** | | | 157.405*** | | 7.166 | | 94.48 |
| **EY** | | 4704181.481*** | | | 1671.815 | | 1384739.678*** | | | 48425.599*** | | 12671.84 | | 1197.3 |
| **TY** | | 11507819.593*** | | | 61210.572 | | 4471028.318*** | | | 192030.377*** | | 5258.366 | | 3360.41 |
| **MY** | | 17698908.521*** | | | 119525.52 | | 4079444.989*** | | | 198097.335*** | | 19386.39 | | 3086.69 |
| **PD** | | 0.467* | | | 0.043 | | 0.256*** | | | 0.179*** | | 0.013 | | 4.62 |
| **ED** | | 0.636ns | | | 0.141 | | 1.702*** | | | 0.228*** | | 0.019 | | 5.69 |
| **FSI** | | 0.000077ns | | | 0.0005 | | 0.080*** | | | 0.007*** | | 0.000324 | | 0.82 |
| **FF** | | 0.191ns | | | 0.017 | | 0.353*** | | | 0.288*** | | 0.008 | | 3.98 |
| **NFL** | | 0.593** | | | 0.001 | | 4.671*** | | | 1.088*** | | 0.001 | | 4.2 |
| **FT** | | 0.339*** | | | 0.0005 | | 0.033*** | | | 0.022*** | | 0.000294 | | 0.55 |
| **TSS** | | 1.235* | | | 0.043 | | 0.302*** | | | 0.046ns | | 0.029 | | 5.07 |
| **VC** | | 6.811* | | | 0.095 | | 69.215*** | | | 35.380*** | | 0.062 | | 14.34 |
| **TA** | | 0.076** | | | 0.003 | | 0.055*** | | | 0.006** | | 0.002 | | 0.5 |
| **Lyc** | | 0.109*** | | | 0.001 | | 0.068*** | | | 0.012*** | | 0.004 | | 0.43 |
| **ß-Carot** | | 0.002ns | | | 0.001 | | 0.006*** | | | 0.002*** | | 0.001 | | 0.11 |
| **TI** | | 0.012ns | | | 0.002 | | 0.011*** | | | 0.002ns | | 0.001 | | 1.04 |
| **M** | | 10.867ns | | | 2.749 | | 33.814*** | | | 4.122* | | 2.118 | | 10.7 |
|  | **Genetic parameters** | | | | | | | | | | | | | |
| ***δ2g*** | | ***δ2gy*** | ***δ2e*** | | ***δ2ph*** | | ***ECV* (%)** | ***PCV* (%)** | | ***GCV* (%)** | | ***h2b* (%)** | |
| **TYLCDS-45** | 0.337 | | 0.007 | 0.049 | | 0.349 | | 12.36 | 32.96 | | 32.40 | | 96.65 | |
| **TYLCDS-90** | 0.519 | | 0.065 | 0.113 | | 0.570 | | 16.04 | 36.01 | | 34.35 | | 90.99 | |
| **PL** | 1580.715 | | 12.08 | 4.882 | | 1587.571 | | 2.52 | 45.51 | | 45.41 | | 99.57 | |
| **NPMB** | 1.805 | | -0.07 | 0.283 | | 1.817 | | 7.73 | 19.58 | | 19.52 | | 99.33 | |
| **LA** | 3464.744 | | 346.5 | 1905 | | 3955.495 | | 15.63 | 22.52 | | 21.07 | | 87.59 | |
| **Chlor-a** | 6.519 | | -36.2 | 143.5 | | 12.341 | | 40.73 | 11.94 | | 8.68 | | 52.82 | |
| **Chlor-b** | 1.249 | | -4.24 | 26.31 | | 3.512 | | 41.31 | 15.09 | | 9.00 | | 35.56 | |
| **T-Chlor** | 13.595 | | -67.4 | 286.6 | | 27.639 | | 40.67 | 12.57 | | 8.81 | | 49.19 | |
| **T-Carot** | 0.257 | | -1.3 | 5.654 | | 0.551 | | 46.69 | 14.56 | | 9.93 | | 46.58 | |
| **NPF** | 64.322 | | 7.701 | 0.846 | | 68.314 | | 2.64 | 23.75 | | 23.05 | | 94.16 | |
| **AFW** | 210.954 | | 50.08 | 7.166 | | 237.188 | | 2.83 | 16.3 | | 15.37 | | 88.94 | |
| **EY** | 222719.013 | | 11918 | 12672 | | 230789.946 | | 9.40 | 40.12 | | 39.42 | | 96.50 | |
| **TY** | 713166.324 | | 62257 | 5258 | | 745171.386 | | 2.16 | 25.69 | | 25.13 | | 95.71 | |
| **MY** | 635084.773 | | 63106 | 19386 | | 669868.593 | | 4.51 | 26.52 | | 25.82 | | 94.81 | |
| **PD** | 0.013 | | 0.055 | 0.013 | | 0.043 | | 2.47 | 4.47 | | 2.45 | | 30.08 | |
| **ED** | 0.246 | | 0.07 | 0.019 | | 0.284 | | 2.42 | 9.36 | | 8.71 | | 86.60 | |
| **FSI** | 0.012 | | 0.002 | 0 | | 0.013 | | 2.19 | 14.03 | | 13.4 | | 91.25 | |
| **FF** | 0.011 | | 0.093 | 0.008 | | 0.059 | | 2.25 | 6.09 | | 2.61 | | 18.41 | |
| **NFL** | 0.597 | | 0.362 | 0.001 | | 0.779 | | 0.75 | 20.99 | | 18.38 | | 76.71 | |
| **FT** | 0.002 | | 0.007 | 0 | | 0.006 | | 3.10 | 13.41 | | 7.74 | | 33.33 | |
| **TSS** | 0.043 | | 0.006 | 0.029 | | 0.050 | | 3.36 | 4.42 | | 4.07 | | 84.77 | |
| **VC** | 5.639 | | 11.77 | 0.062 | | 11.536 | | 1.74 | 23.68 | | 16.56 | | 48.88 | |
| **TA** | 0.008 | | 0.001 | 0.002 | | 0.009 | | 8.96 | 19.19 | | 18.11 | | 89.09 | |
| **Lyc** | 0.009 | | 0.003 | 0.004 | | 0.011 | | 14.67 | 24.7 | | 22.42 | | 82.35 | |
| **ß-Carot** | 0.001 | | 0 | 0.001 | | 0.001 | | 28.23 | 32.6 | | 28.23 | | 75.00 | |
| **TI** | 0.002 | | 0 | 0.001 | | 0.002 | | 3.06 | 4.14 | | 3.74 | | 81.82 | |
| **M** | 4.949 | | 0.668 | 2.118 | | 5.636 | | 13.6 | 22.18 | | 20.79 | | 87.81 | |

**Table 3. Genotypic (above diagonal) and phenotypic (below diagonal) correlations between 27 traits of tomato lines.**

|  | **TYLCDS-45** | | | **TYLCDS-90** | | **PL** | | **NPMB** | | **LA** | | **Chlor-a** | **Chlor-b** | | **T-Chlor** | | **T-Car** | | **EY** | | **TY** | | **MY** | | **NPF** | | **AFW** |
| --- | --- | --- | --- | --- | --- | --- | --- | --- | --- | --- | --- | --- | --- | --- | --- | --- | --- | --- | --- | --- | --- | --- | --- | --- | --- | --- | --- |
| **TYLCDS-45** | **1** | | | 0.933*** | | -0.724*** | | -0.396 | | -0.787*** | | 0.428 | 0.495* | | 0.447 | | 0.501* | | -0.752*** | | -0.804*** | | -0.821*** | | -0.731*** | | -0.616*** |
| **TYLCDS-90** | 0.901*** | | | **1** | | -0.586** | | -0.456 | | -0.856*** | | 0.168 | 0.17 | | 0.168 | | 0.326 | | -0.814*** | | -0.937*** | | -0.940*** | | -0.853*** | | -0.792*** |
| **PL** | -0.710*** | | | -0.573** | | **1** | | 0.415 | | 0.761*** | | -0.126 | -0.249 | | -0.163 | | -0.194 | | 0.273 | | 0.520* | | 0.531* | | 0.655*** | | 0.188 |
| **NPMB** | -0.391 | | | -0.445* | | 0.415* | | **1** | | 0.860*** | | 0.669*** | 0.075 | | 0.704*** | | 0.479* | | 0.372 | | 0.664*** | | 0.664*** | | 0.608*** | | 0.643*** |
| **LA** | -0.730*** | | | -0.725*** | | 0.701*** | | 0.795*** | | **1** | | 0.183 | 0.28 | | 0.212 | | -0.177 | | 0.517** | | 0.921*** | | 0.918*** | | 0.917*** | | 0.732*** |
| **Chlor-a** | 0.281 | | | 0.117 | | -0.098 | | 0.482* | | 0.192 | | **1** | 1.000*** | | 1.000*** | | 0.787*** | | -0.189 | | 0.33 | | 0.308 | | 0.339 | | 0.436 |
| **Chlor-b** | 0.271 | | | 0.079 | | -0.146 | | 0.062 | | 0.18 | | 0.895*** | **1** | | 1.000*** | | 0.593** | | 0.081 | | 0.479* | | 0.501* | | 0.439 | | 0.583****** |
| **T-Chlor** | 0.285 | | | 0.107 | | -0.118 | | 0.497* | | 0.193 | | 0.987*** | 0.955*** | | **1** | | 0.725*** | | -0.106 | | 0.374 | | 0.365 | | 0.368 | | 0.478***** |
| **T-Carot** | 0.304 | | | 0.228 | | -0.144 | | 0.321 | | -0.046 | | 0.826*** | 0.694*** | | 0.800*** | | **1** | | -0.112 | | 0.081 | | 0.092 | | 0.111 | | 0 |
| **EY** | -0.739*** | | | -0.778*** | | 0.268 | | 0.361 | | 0.484* | | -0.195 | -0.043 | | -0.146 | | -0.145 | | **1** | | 0.790*** | | 0.839*** | | 0.556***** | | 0.763*** |
| **TY** | -0.777*** | | | -0.909*** | | 0.513** | | 0.654*** | | 0.817*** | | 0.17 | 0.215 | | 0.19 | | 0.005 | | 0.773*** | | **1** | | 1.000*** | | 0.910*** | | 0.846*** |
| **MY** | -0.792*** | | | -0.902*** | | 0.519** | | 0.651*** | | 0.814*** | | 0.144 | 0.206 | | 0.17 | | 0.005 | | 0.819*** | | 1.000*** | | **1** | | 0.913*** | | 0.824*** |
| **NPF** | -0.698*** | | | -0.822*** | | 0.638*** | | 0.596*** | | 0.825*** | | 0.17 | 0.19 | | 0.181 | | 0.025 | | 0.539** | | 0.906*** | | 0.902*** | | **1** | | 0.556*** |
| **AFW** | -0.600*** | | | -0.739*** | | 0.178 | | 0.607*** | | 0.612*** | | 0.185 | 0.21 | | 0.198 | | 0 | | 0.745*** | | 0.822*** | | 0.809*** | | 0.529** | | **1** |
| **FPD** | -0.144 | | | -0.11 | | 0.412 | | 0.352 | | 0.208 | | -0.024 | 0.106 | | 0.022 | | 0.017 | | 0.175 | | 0.137 | | 0.155 | | 0.07 | | 0.13 |
| **FED** | -0.639*** | | | -0.825*** | | 0.263 | | 0.686*** | | 0.713*** | | 0.247 | 0.241 | | 0.251 | | 0.067 | | 0.705*** | | 0.900*** | | 0.881*** | | 0.737*** | | 0.914*** |
| **FSI** | 0.562** | | | 0.745*** | | -0.166 | | -0.570** | | -0.663*** | | -0.256 | -0.199 | | -0.242 | | -0.055 | | -0.575** | | -0.825*** | | -0.800*** | | -0.732*** | | -0.797*** |
| **FF** | -0.508** | | | -0.529** | | 0.115 | | 0.131 | | 0.25 | | -0.279 | -0.224 | | -0.266 | | -0.256 | | 0.5490** | | 0.490* | | 0.488* | | 0.315 | | 0.584** |
| **NFL** | -0.381 | | | -0.451* | | -0.165 | | -0.109 | | 0.074 | | -0.337 | -0.251 | | -0.314 | | -0.446* | | 0.650*** | | 0.401 | | 0.431* | | 0.149 | | 0.592** |
| **FFT** | -0.234 | | | -0.308 | | 0.326 | | 0.374 | | 0.245 | | 0.316 | 0.326 | | 0.327 | | 0.455* | | 0.403 | | 0.381 | | 0.408 | | 0.363 | | 0.245 |
| **TSS** | -0.255 | | | -0.344 | | 0.467 | | 0.437* | | 0.619*** | | 0.161 | 0.17 | | 0.168 | | -0.077 | | 0.126 | | 0.508** | | 0.482* | | 0.666*** | | 0.227 |
| **VC** | -0.704*** | | | -0.495** | | 0.589*** | | -0.126 | | 0.266 | | -0.464* | -0.444* | | -0.469* | | -0.414* | | 0.472 | | 0.271 | | 0.304 | | 0.177 | | 0.187 |
| **TA** | -0.017 | | | -0.198 | | -0.422 | | -0.052 | | -0.098 | | 0.014 | 0.052 | | 0.028 | | -0.068 | | 0.267 | | 0.204 | | 0.172 | | -0.055 | | 0.537* |
| **Lyc** | 0.218 | | | 0.062 | | -0.338 | | -0.159 | | -0.246 | | 0.235 | 0.312 | | 0.268 | | 0.208 | | -0.004 | | 0.037 | | 0.031 | | -0.041 | | 0.125 |
| **ß-Carot** | -0.295 | | | -0.397 | | 0.138 | | 0.423* | | 0.344 | | 0.392 | 0.444* | | 0.421* | | 0.302 | | 0.530** | | 0.535** | | 0.539** | | 0.316 | | 0.637*** |
| **TI** | -0.398 | | | -0.404 | | 0.766*** | | 0.33 | | 0.560** | | -0.064 | 0.041 | | -0.028 | | -0.222 | | 0.123 | | 0.433* | | 0.417 | | 0.633*** | | 0.062 |
| **M** | -0.131 | | | 0.011 | | 0.620*** | | 0.161 | | 0.282 | | -0.034 | -0.026 | | -0.032 | | -0.025 | | -0.17 | | -0.006 | | 0.013 | | 0.275 | | -0.41 |
|  | | **FPD** | **FED** | | **FSI** | | **FF** | | **NFL** | | **FFT** | | | **TSS** | | **VC** | | **TA** | | **Lyc** | | **ß-Carot** | | **TI** | | **M** | |
| **TYLCDS-45** | | -0.084 | -0.692*** | | 0.617** | | -1.000*** | | -0.425 | | -0.353 | | | -0.278 | | -0.962*** | | -0.034 | | 0.256 | | -0.327 | | -0.425 | | -0.121 | |
| **TYLCDS-90** | | -0.134 | -0.908*** | | 0.808*** | | -1.000*** | | -0.579* | | -0.450* | | | -0.42 | | -0.696*** | | -0.254 | | 0.069 | | -0.43 | | -0.5 | | 0.03 | |
| **PL** | | 0.771*** | 0.277 | | -0.134 | | 0.271 | | -0.174 | | 0.517* | | | 0.519* | | 0.835*** | | -0.44 | | -0.377 | | 0.146 | | 0.856*** | | 0.659*** | |
| **NPMB** | | 0.645*** | 0.734*** | | -0.594** | | 0.328 | | -0.135 | | 0.651** | | | 0.479* | | -0.2 | | -0.049 | | -0.185 | | 0.488* | | 0.371 | | 0.169 | |
| **LA** | | 0.501** | 0.814*** | | -0.728*** | | 0.688*** | | 0.063 | | 0.570** | | | 0.712*** | | 0.36 | | -0.128 | | -0.313 | | 0.377 | | 0.700*** | | 0.349 | |
| **Chlor-a** | | 0.058 | 0.445 | | -0.442 | | -0.198 | | -0.558** | | 1.000*** | | | 0.143 | | -0.614** | | 0.114 | | 0.388 | | 0.568** | | -0.206 | | -0.164 | |
| **Chlor-b** | | 0.613****** | 0.544***** | | -0.417 | | 0.222 | | -0.510***** | | 1.000*** | | | 0.268 | | **-0.659***** | | 0.258 | | 0.545***** | | 0.759******* | | 0.018 | | -0.205 | |
| **T-Chlor** | | 0.226 | 0.473 | | -0.432 | | -0.07 | | -0.541* | | 1.000*** | | | 0.18 | | -0.625****** | | 0.157 | | 0.434 | | 0.623****** | | -0.137 | | -0.176 | |
| **T-Carot** | | 0.156 | 0.202 | | -0.15 | | -0.399 | | -0.747*** | | 1.000*** | | | -0.3 | | -0.582** | | -0.014 | | 0.345 | | 0.450* | | -0.559** | | -0.185 | |
| **EY** | | 0.19 | 0.737*** | | -0.605*** | | 1.000*** | | 0.769*** | | 0.624** | | | 0.15 | | 0.605** | | 0.285 | | -0.014 | | 0.606** | | 0.154 | | -0.177 | |
| **TY** | | 0.233 | 0.946*** | | -0.850*** | | 1.000*** | | 0.484* | | 0.607** | | | 0.568** | | 0.384 | | 0.222 | | 0.042 | | 0.617** | | 0.509* | | -0.001 | |
| **MY** | | 0.23 | 0.927*** | | -0.829*** | | 1.000*** | | 0.511* | | 0.68*** | | | 0.536* | | 0.409 | | 0.175 | | 0.037 | | 0.634** | | 0.493** | | 0.032 | |
| **Continued** | | | | | | | | | | | | | | | | | | | | | | | | | | | |
| **Table 3. Continued.** | | | | | | | | | | | | | | | | | | | | | | | | | | | |
|  | | **FPD** | **FED** | | **FSI** | | **FF** | | **NFL** | | **FFT** | | | **TSS** | | **VC** | | **TA** | | **Lyc** | | **ß-Carot** | | **TI** | | **M** | |
| **NPF** | | 0.220 | 0.797*** | | -0.751*** | | 0.801*** | | 0.178 | | 0.667*** | | | 0.752*** | | 0.289 | | -0.061 | | -0.038 | | 0.379 | | 0.762*** | | 0.288 | |
| **AFW** | | -0.102 | 0.963*** | | -0.873*** | | 1.000*** | | 0.739*** | | 0.24 | | | 0.254 | | 0.141 | | 0.605** | | 0.111 | | 0.742*** | | 0.042 | | -0.476***** | |
| **FPD** | | **1** | -0.125 | | 0.355 | | -0.666*** | | -0.524* | | 0.505* | | | 0.259 | | -0.054 | | 0.007 | | -0.179 | | 0.293 | | 0.639** | | 0.227 | |
| **FED** | | 0.028 | **1** | | **-0.980***** | | 1.000*** | | 0.633** | | 0.445 | | | 0.43 | | 0.074 | | 0.516* | | -0.047 | | 0.542* | | 0.225 | | -0.339 | |
| **FSI** | | 0.307 | -0.937*** | | **1** | | -1.000*** | | -0.616** | | -0.324 | | | -0.451* | | -0.006 | | -0.396 | | 0.009 | | -0.447 | | -0.163 | | 0.265 | |
| **FF** | | 0.098 | 0.531** | | -0.447***** | | **1** | | 0.745******* | | -0.807*** | | | 0.182 | | 0.408 | | 1.000*** | | 0.787*** | | 0.965*** | | 0.022 | | **-1.000***** | |
| **NFL** | | -0.2 | 0.480* | | -0.475***** | | 0.604*** | | **1** | | 0.295 | | | -0.193 | | 0.461 | | 0.620** | | 0.259 | | 0.426 | | -0.308 | | -0.610****** | |
| **FFT** | | 0.333 | 0.391 | | -0.242 | | -0.034 | | -0.008 | | **1** | | | 0.492* | | -0.058 | | 0.03 | | -0.438 | | 0.724*** | | 0.219 | | 0.058 | |
| **TSS** | | 0.131 | 0.368 | | -0.393 | | 0.121 | | -0.109 | | 0.132 | | | **1** | | -0.069 | | -0.199 | | -0.393 | | 0.207 | | 0.896*** | | 0.477* | |
| **VC** | | 0.147 | 0.087 | | 0.003 | | 0.34 | | 0.298 | | 0.146 | | | -0.067 | | **1** | | -0.156 | | -0.648****** | | 0.187 | | 0.274 | | 0.222 | |
| **TA** | | 0.006 | 0.412 | | -0.331 | | 0.670*** | | 0.561****** | | -0.086 | | | -0.196 | | -0.09 | | **1** | | **0.714***** | | 0.535***** | | -0.378 | | -0.943*** | |
| **Lyc** | | -0.054 | 0.032 | | -0.033 | | 0.176 | | 0.229 | | -0.166 | | | -0.33 | | -0.307 | | 0.552****** | | **1** | | 0.112 | | -0.338 | | -0.694*** | |
| **ß-Carot** | | 0.255 | 0.558****** | | -0.412 | | 0.248 | | 0.263 | | 0.532****** | | | 0.126 | | 0.158 | | 0.365 | | 0.217 | | **1** | | 0.184 | | -0.366 | |
| **TI** | | 0.398 | 0.168 | | -0.107 | | 0.068 | | -0.25 | | 0.173 | | | 0.815*** | | 0.23 | | -0.368 | | -0.256 | | 0.082 | | **1** | | 0.671*** | |
| **M** | | 0.141 | -0.27 | | 0.228 | | -0.518****** | | -0.543****** | | 0.135 | | | 0.455* | | 0.156 | | -0.938*** | | -0.534****** | | -0.261 | | 0.673******* | | **1** | |

**Table 4.** **Component loading values of the first six principal components for 27 traits of tomato lines and ‘Castlerock’.**

| **Traitz** | **PC1** | **PC2** | **PC3** | **PC4** | **PC5** |
| --- | --- | --- | --- | --- | --- |
| **TYLCDS-45** | **-0.826** | -0.040 | 0.454 | -0.138 | 0.158 |
| **TYLCDS-90** | **-0.908** | 0.098 | 0.266 | 0.027 | 0.079 |
| **PL** | 0.596 | **0.630** | -0.327 | 0.200 | 0.075 |
| **NPB** | **0.696** | 0.259 | 0.411 | -0.095 | 0.073 |
| **LA** | **0.855** | 0.303 | -0.013 | -0.196 | 0.024 |
| **Chlor-a** | 0.146 | 0.151 | **0.931** | -0.062 | -0.074 |
| **Chlor-b** | 0.182 | 0.114 | **0.890** | -0.010 | 0.080 |
| **T-Chlor** | **0.566** | 0.447 | 0.239 | 0.416 | -0.086 |
| **T-Carot** | -0.004 | 0.162 | **0.865** | 0.216 | -0.216 |
| **EY** | **0.781** | -0.305 | -0.198 | 0.242 | -0.145 |
| **TY** | **0.979** | -0.050 | 0.036 | -0.100 | -0.005 |
| **MY** | **0.974** | -0.044 | 0.017 | -0.050 | -0.034 |
| **NPF** | **0.872** | 0.239 | 0.005 | -0.266 | 0.002 |
| **AFW** | **0.831** | -0.429 | 0.121 | -0.010 | 0.038 |
| **FPD** | 0.215 | 0.284 | 0.020 | 0.548 | **0.629** |
| **FED** | **0.899** | -0.285 | 0.167 | -0.178 | -0.076 |
| **FSI** | **-0.794** | 0.287 | -0.152 | 0.420 | 0.249 |
| **FF** | 0.519 | **-0.538** | -0.282 | 0.065 | 0.300 |
| **NFL** | 0.378 | **-0.738** | -0.324 | -0.017 | -0.105 |
| **FT** | 0.447 | 0.209 | 0.328 | **0.469** | -0.232 |
| **TSS** | **0.506** | 0.464 | 0.000 | -0.491 | 0.323 |
| **VC** | 0.363 | 0.070 | **-0.645** | 0.510 | -0.196 |
| **TA** | 0.179 | **-0.872** | 0.135 | 0.043 | 0.347 |
| **Lyc** | -0.057 | -0.515 | **0.373** | 0.088 | 0.312 |
| **ß-Carot** | **0.656** | -0.223 | 0.441 | 0.403 | 0.049 |
| **TI** | 0.461 | **0.654** | -0.219 | -0.140 | 0.434 |
| **M** | 0.025 | **0.942** | -0.189 | -0.086 | -0.121 |

**Table 5. Clusters performance and statistics of clusters for tomato lines and ‘Castlerock’ based on 27 morphological traits.**

| **Trait** | **Cluster-1** | **Cluster-2** | **Cluster-3** | **Cluster-4** |
| --- | --- | --- | --- | --- |
| **TYLCDS-45** | **1.55** | **1.98** | **1.20** | **3.29** |
| **TYLCDS-90** | **1.74** | **2.31** | **1.47** | **4.48** |
| **PL (cm)** | **89.13** | **77.62** | **210.00** | **20.38** |
| **NPMB** | **7.14** | **7.02** | **7.50** | **2.98** |
| **LA (cm2)** | **291.55** | **281.59** | **364.10** | **68.38** |
| **Chlor-a (mg g-1 FW)** | **29.15** | **30.26** | **29.65** | **25.65** |
| **Chlor-b (mg g-1 FW)** | **12.65** | **12.36** | **12.37** | **10.73** |
| **T-Chlor (mg g-1 FW)** | **48.12** | **44.74** | **58.60** | **36.39** |
| **T-Carot (mg g-1 FW)** | **5.10** | **5.15** | **4.83** | **4.95** |
| **EY (g plant-1)** | **1604.72** | **877.26** | **821.67** | **146.33** |
| **TY (g plant-1)** | **3798.80** | **3167.14** | **3870.00** | **258.17** |
| **MY (g plant-1)** | **3548.03** | **2842.86** | **3500.00** | **228.17** |
| **NPF** | **36.87** | **34.50** | **47.17** | **5.88** |
| **AFW (g)** | **102.95** | **92.08** | **81.89** | **47.56** |
| **FPD (cm)** | **4.68** | **4.49** | **5.05** | **4.65** |
| **FED (cm)** | **5.92** | **5.71** | **5.42** | **3.72** |
| **FSI** | **0.79** | **0.79** | **0.93** | **1.25** |
| **FF (kg cm-2)** | **4.05** | **3.98** | **3.82** | **3.58** |
| **NFL** | **4.67** | **4.00** | **2.50** | **3.13** |
| **FT (cm)** | **0.58** | **0.52** | **0.60** | **0.46** |
| **Lyc (mg g-1 FW)** | **0.45** | **0.42** | **0.34** | **0.45** |
| **ß-Carot (mg g-1 FW)** | **0.13** | **0.09** | **0.10** | **0.05** |
| **VC (mg 100g-1 FW)** | **15.42** | **12.36** | **18.53** | **14.28** |
| **TSS (°Brix)** | **5.06** | **5.11** | **5.48** | **4.53** |
| **TA (mg citric acid 100g-1 FW)** | **0.52** | **0.50** | **0.33** | **0.43** |
| **TI** | **1.03** | **1.03** | **1.17** | **0.97** |
| **M** | **10.19** | **10.49** | **16.73** | **10.74** |
| **Statistics** |  |  |  |  |
| **Number of genotypes** | **9** | **7** | **1** | **1** |
| **Within-class variance** | **155122.784** | **154507.025** | **0** | **0** |
| **Minimum distance to centroid** | **84.425** | **33.119** | **0** | **0** |
| **Average distance to centroid** | **325.704** | **293.655** | **0** | **0** |
| **Maximum distance to centroid** | **712.242** | **649.576** | **0** | **0** |
| **Distances between the class centroids:** |  |  |  |  |
| **Cluster-1** | **0** | **1194.081** | **800.714** | **5073.774** |
| **Cluster-2** |  | **0** | **976.630** | **3985.557** |
| **Cluster-3** |  |  | **0** | **4932.869** |
| **Cluster-4** |  |  |  | **0** |
